# Supplementary material for: Revealing the charge transport mechanism of a photoelectrochemical cell: analysis using A.C. voltage perturbation
Source: Royal Society of Chemistry journal article supplement (doi:10.1039/c4cp01734j), 2014-01-01
Supplement: c4cp01734j1.pdf [file c4cp01734j1.pdf]

# Supporting information for

## Revealing the Charge Transport Mechanism of a Photoelectrochemical cell: Analysis by A.C. voltage perturbation

Dipal B. Patel, Khushbu R. Chauhan, and Indrajit Mukhopadhyay\*

School of Solar Energy, Pandit Deendayal Petroleum University, Raisan,  
Gandhinagar-382007, India

E-mail: [indrajit.m@sse.pdpu.ac.in](mailto:indrajit.m@sse.pdpu.ac.in)

Phone: +91-79-23275303. Fax: +91-79-23275030

Index:

SI-Figure-1: The XRD spectrum of used  $\text{PbO}_x$  thin film.

SI-Figure-2: The diffused reflectance spectrum of the  $\text{PbO}_x$  film.

SI-Figure-3: The Nyquist plot for the less porous film to assign the first semi-circle to the charge transfer resistance.

SI-Figure-4: FE-SEM images of the anodized lead electrode by (a) potentiodynamic and (b) potential pulse electrodeposition method.

SI-Figure-5: FE-SEM images of the anodized lead electrode showing vertically aligned interconnected nanowalls.

SI-Figure-6: A cross sectional view of anodized  $\text{PbO}_x$  electrode

SI-Figure-7: Nyquist plot of A.C. conductivity for the extraction of D.C. conductivity from higher frequency region.

SI-Figure-8: Variation of frequency exponent in universal power law with temperature to choose the CBH model for the assignment of current mechanism.

SI-Figure-9: Variation of minority carrier life time with bias under (A) dark and (B) illumination conditions.

SI-Table-1: Fitted circuit parameters at select potentials.

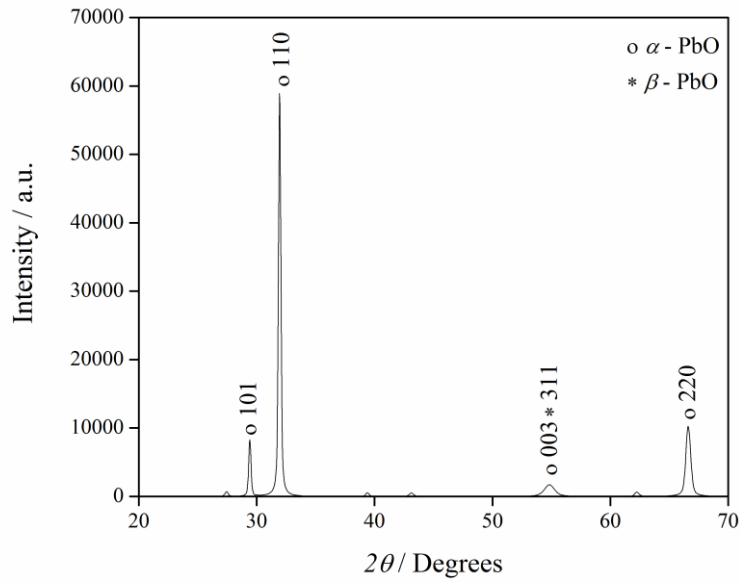

Figure 1 The XRD spectrum of used PbO<sub>x</sub> thin film.

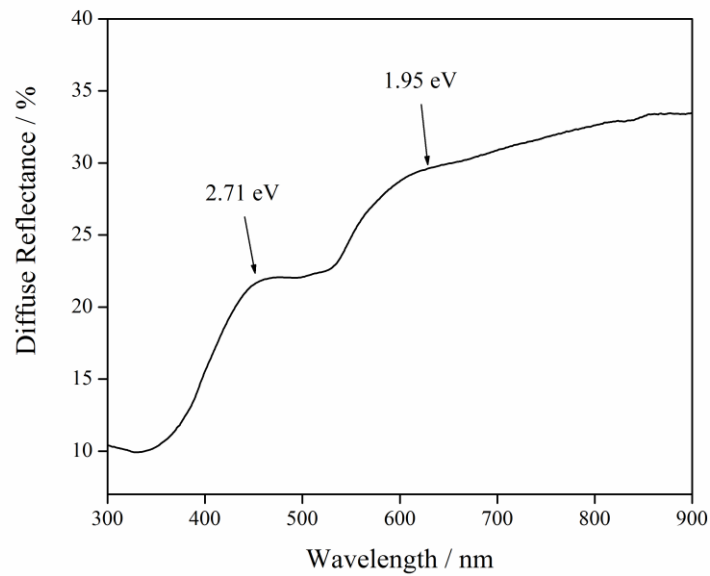

SI-Figure-2 The diffused reflectance spectrum of the PbO<sub>x</sub> film (1.95 and 2.71 eV band gaps corresponds to α-PbO and β-PbO, respectively)

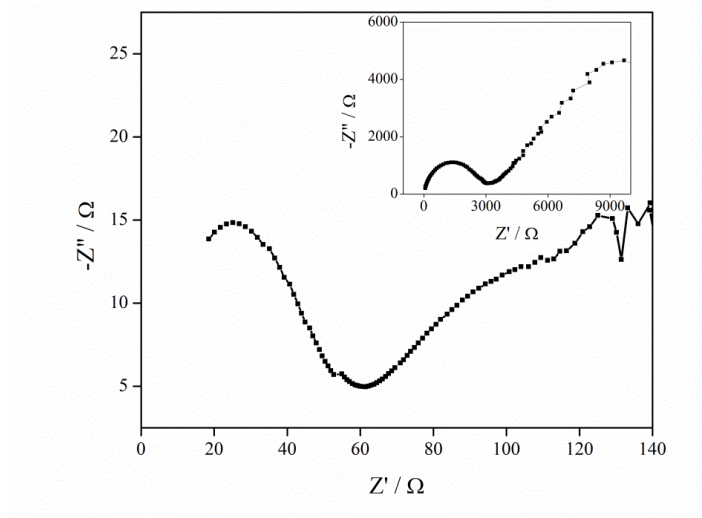

SI-Figure-3: The Nyquist plot for the less porous film (SI-Figure-2 (a)) to assign the first semi-circle to the charge transfer resistance.

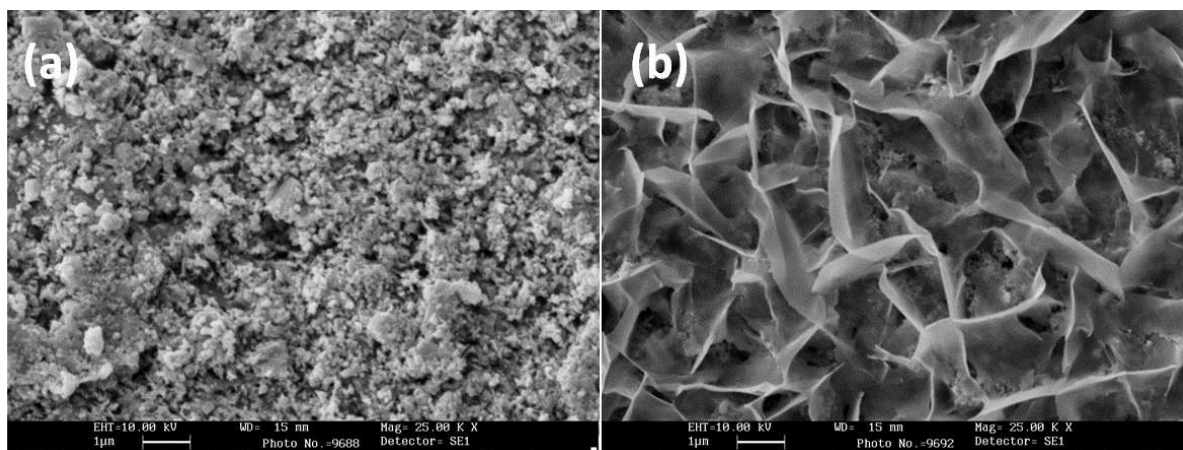

SI-Figure-4: FE-SEM images of the anodized lead electrode by (a) potentiodynamic and (b) potential pulse electrodeposition method.

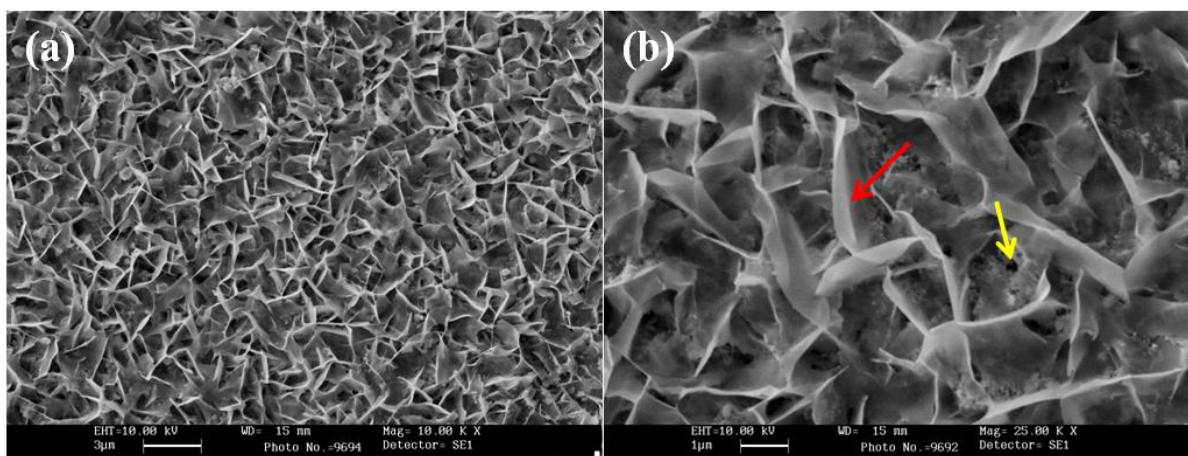

SI-Figure-5: FE-SEM images of the anodized lead electrode showing vertically aligned interconnected nanowalls having nano-pores on the walls (marked with RED arrow) and in the underneath layer (marked with YELLOW arrow).

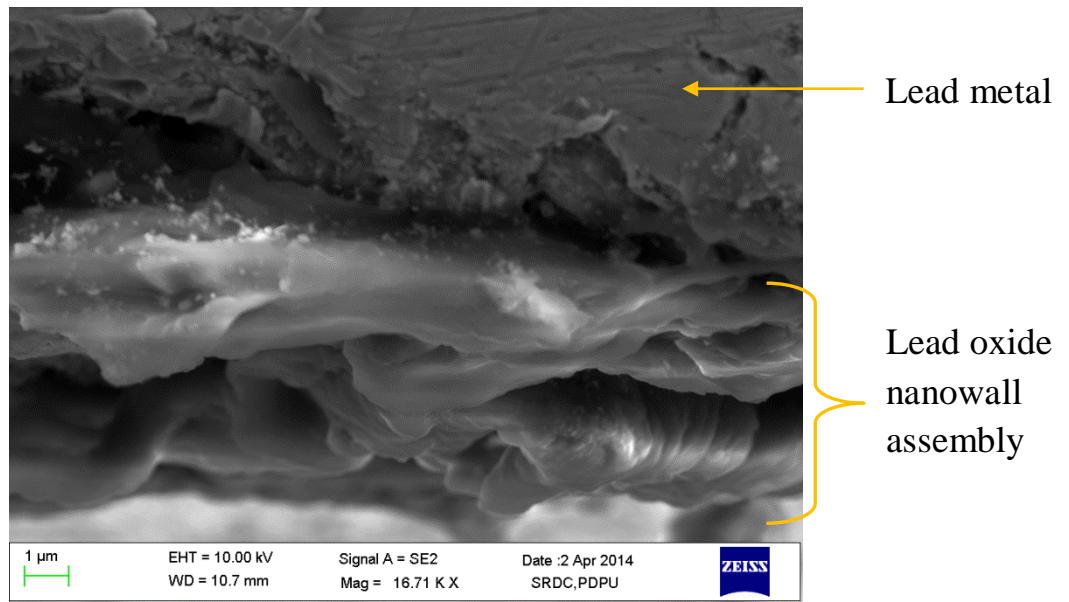

SI-Figure-6: A cross sectional view of anodized  $\text{PbO}_x$  electrode.

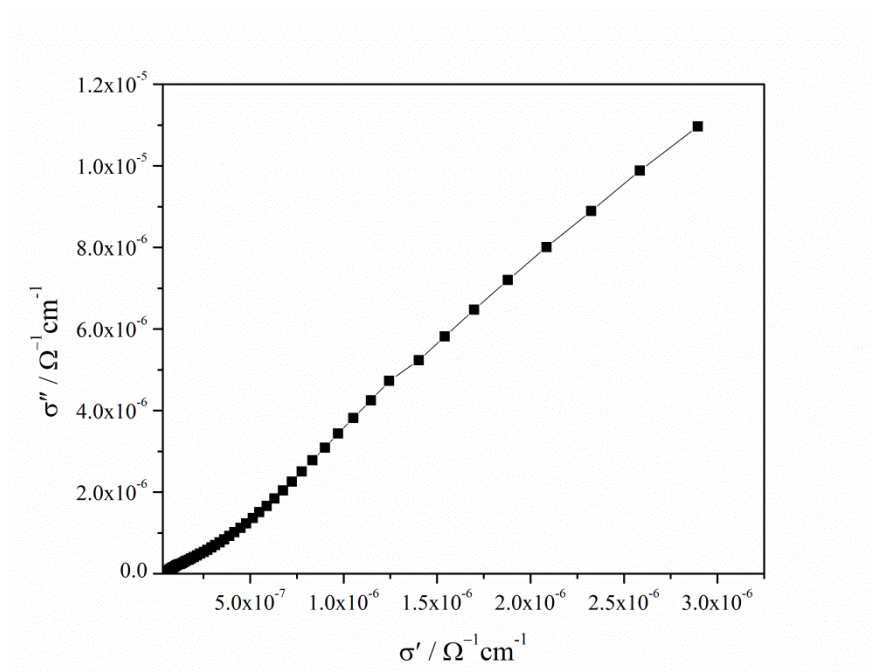

SI-Figure-7: Nyquist plot of A.C. conductivity for the extraction of D.C. conductivity from higher frequency region.

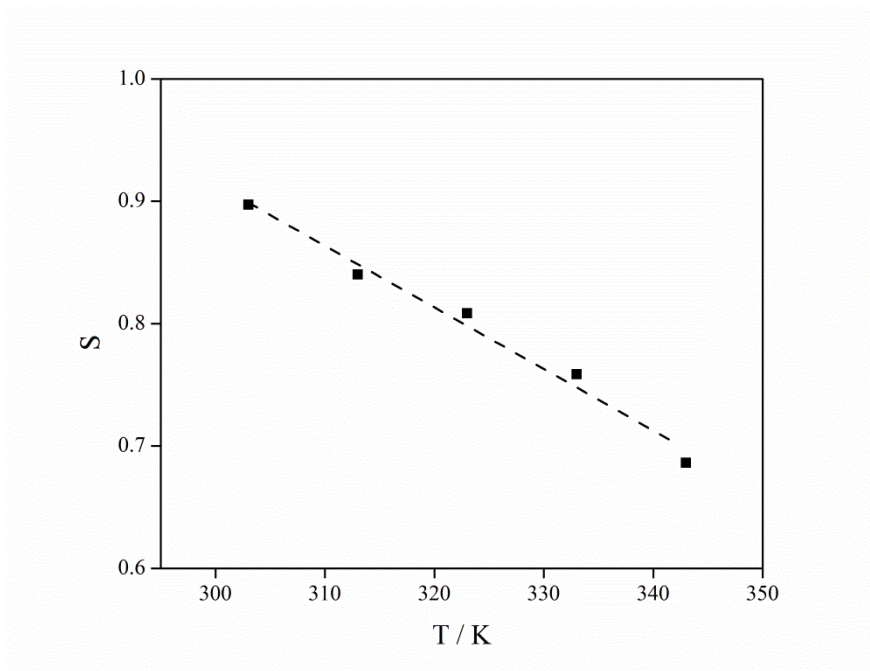

SI-figure-8: Variation of frequency exponent in universal power law with temperature to choose the CBH model for the assignment of current mechanism.

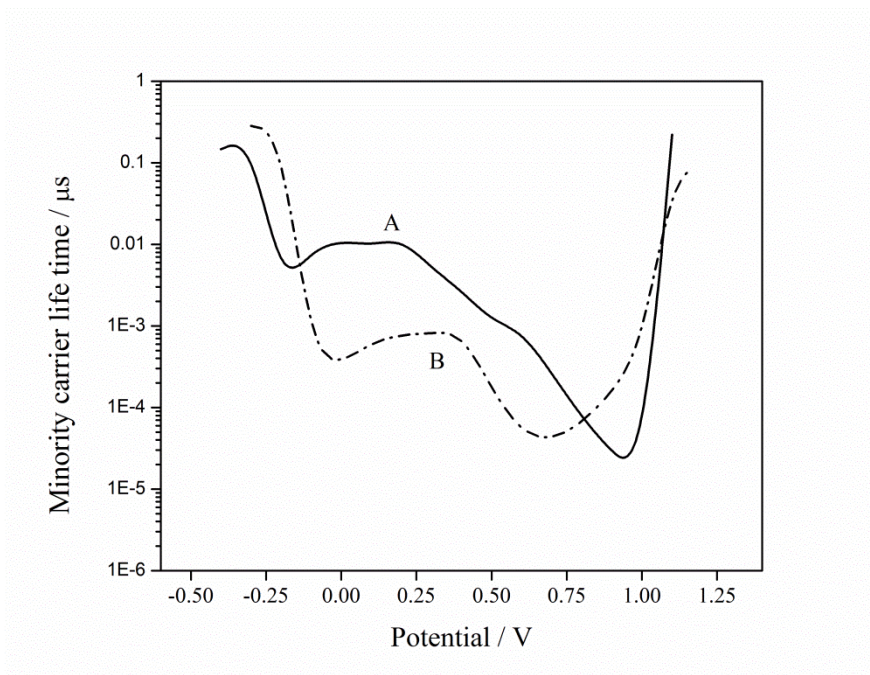

SI-Figure-9: Variation of minority carrier life time (calculated from the  $R_{rec}CPE2$  time constant of the fitted circuit) with bias under (A) dark and (B) illumination conditions.

SI-Table-1 Fitted circuit parameters at select potentials

| Potential / V<br>(vs. Hg/HgO) | $R_{ct} / \Omega$ | $R_{rec} / \Omega$ | CPE1 / F cm <sup>-2</sup> | CPE2 / F cm <sup>-2</sup> |
|-------------------------------|-------------------|--------------------|---------------------------|---------------------------|
| -0.6                          | 33                | 45                 | 5 E-07                    | 1.79 E-07                 |
| -0.5                          | 120               | 1186               | 4.5 E-04                  | 3.94 E-04                 |
| 0.3                           | 1888              | 3007               | 6.83 E-05                 | 2.7 E-07                  |
| 0.8                           | 669               | 249                | 4.3 E-03                  | 2.59 E-07                 |
